# Supplementary material for: High-level accumulation of oleyl oleate in plant seed oil by abundant supply of oleic acid substrates to efficient wax ester synthesis enzymes
Source: PubMed Central journal article supplement (PMC5831613; doi:10.1186/s13068-018-1057-4), 2018-03-01

**Wild type**

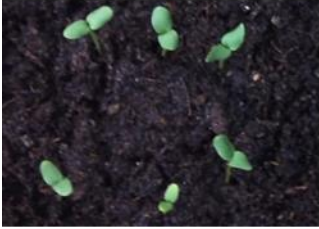

**MaFAR/ScWS**

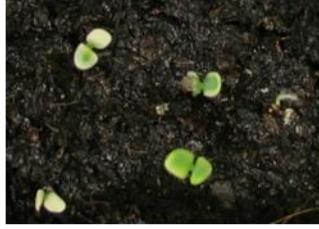

**L9 MS & HO cross**

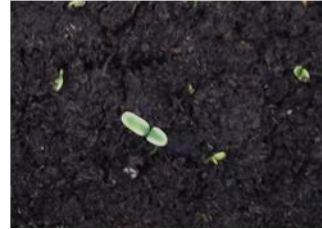

Supplement: 13068_2018_1057_MOESM6_ESM.pdf [file 13068_2018_1057_MOESM6_ESM.pdf]
