# Supplementary material for: High-level accumulation of oleyl oleate in plant seed oil by abundant supply of oleic acid substrates to efficient wax ester synthesis enzymes
Source: Biotechnol Biofuels. 2018 Mar 1;11:53. doi: 10.1186/s13068-018-1057-4 (PMC5831613; doi:10.1186/s13068-018-1057-4)
Supplement: Supplementary file 2 — Additional file 2: Table S1. Raw data obtained by GC-FID to quantify the wax ester content in seeds of transgenic Arabidopsis transformed with MaFAR/ScWS, ScWS-MaFAR, ScWS-MaFAR/ScWS-MaFAR, ScWS-MaFAR/MaFAR, MaFAR/AbWSD1, MaFAR/PCOAbWSD1, MaFAR/TMMmAWAT2-AbWSD1 and MaFAR/MaWS2 shown in Figs. 1 and 3. [file 13068_2018_1057_MOESM2_ESM.xlsx]

## Sheet: OH mol%
Additional file 2
Relative Fatty Alcohols Amounts
			mol%	mol%	mol%	mol%	mol%	mol%	mol%	mol%	mol%	mol%	mol%	mol%	mol%
Extraction	Construct		16:0-OH	16:1-OH	18:0-OH	18:1-OH	18:2-OH	18:3-OH	20:0-OH	20:1-OH	20:2-OH	22:1-OH	22:2-OH	24:0-OH	24:1-OH
A	MaFAR/ScWS 1	MSA	5.57874	0.399103	11.6095	37.0339	11.2763	1.19081	7.55668	19.9387	0	0.64206	0	0.775992	3.99829
B	MaFAR/ScWS 1	MSB	6.73015	0	8.62638	37.9391	3.8796	3.61015	6.15895	24.2242	5.72902	0	1.73466	0.931024	0.436748
A	MaFAR/ScWS 1	ATMSA	6.00372	4.24549	12.6852	44.6946	10.4132	8.55132	7.23857	2.6458	0	3.52207	0	0	0
B	MaFAR/ScWS 1	ATMSB	5.71045	0.79106	10.2125	36.4593	13.3126	2.3403	6.93271	19.1182	0.769303	0.809287	0.547521	0.891451	2.10537
A	ScWS-MaFAR 1	F5A	2.94047	1.53959	9.80267	21.5233	9.2692	0	7.45902	45.577	0	1.37197	0	0	0.516786
B	ScWS-MaFAR 1	F5B	3.55543	0	10.8362	23.9558	1.91623	0	7.2456	48.966	1.68321	0	0.621374	0.743567	0.476577
A	ScWS-MaFAR 2	F25A	2.43183	1.03018	9.58736	20.6253	7.47168	1.04829	7.76224	48.1592	0	1.29936	0.584519	0	0
B	ScWS-MaFAR 2	F25B	2.18901	0.500246	10.2164	21.1536	0.112822	1.14315	7.70164	53.699	1.67473	0	0.710074	0.899408	0
A	ScWS-MaFAR 3	F37A	2.55038	0	17.9506	17.7201	7.35542	0	9.00366	36.1455	0	8.67989	0.594401	0	0
B	ScWS-MaFAR 3	F37B	2.59792	0	0	20.883	1.7532	0	10.8581	59.7951	2.36525	0	0.701812	1.04559	0
A	ScWS-MaFAR/ScWS-MaFAR 1	FF27A	0	0	0	14.097	9.49673	0	0	54.3313	0	22.075	0	0	0
B	ScWS-MaFAR/ScWS-MaFAR 1	FF27B	2.77603	0	5.52107	13.2729	8.32375	0	0	56.4926	0	13.6137	0	0	0
A	ScWS-MaFAR/ScWS-MaFAR 2	FF34A	0.665739	0	9.21783	22.5433	9.19782	1.26012	7.84147	47.3588	0.660991	1.25394	0	0	0
B	ScWS-MaFAR/ScWS-MaFAR 2	FF34B	2.99882	0	9.44792	19.8611	4.22099	1.2649	7.98003	50.0161	1.61916	2.29039	0.300589	0	0
A	ScWS-MaFAR/ScWS-MaFAR 3	FF37A	1.04435	0.793067	6.58028	27.5301	9.1636	1.08803	5.72711	45.0566	1.49052	0.776497	0.749906	0	0
B	ScWS-MaFAR/ScWS-MaFAR 3	FF37B	2.60085	0.724724	7.00377	17.9167	5.9659	1.10708	5.57102	56.8438	0.668558	1.31915	0.278463	0	0
A	ScWS-MaFAR/MaFAR 1	MF21A	2.79856	0	9.97419	20.1732	2.1096	0	6.5277	56.7789	0.704047	0.933795	0	0	0
B	ScWS-MaFAR/MaFAR 1	MF21B	2.25503	1.17219	9.35827	20.5273	10.8958	0	4.0368	49.7576	0	1.997	0	0	0
A	ScWS-MaFAR/MaFAR 2	MF33A	3.41207	0	8.29748	33.6656	5.29695	1.14189	4.34474	42.8867	0.266042	0.688527	0	0	0
B	ScWS-MaFAR/MaFAR 2	MF33B	1.46214	0	8.11905	32.2311	5.56982	1.17819	3.3311	42.6757	0.554451	4.87851	0	0	0
A	ScWS-MaFAR/MaFAR 3	MF37A	4.67361	0.824361	9.70926	27.8763	9.20189	1.69814	4.40738	36.2327	0.359583	4.31726	0.699465	0	0
B	ScWS-MaFAR/MaFAR 3	MF37B	4.0756	0.518984	9.59863	31.8535	6.30357	1.06036	4.40298	37.265	0.509239	4.41214	0	0	0
A	MaFAR/AbWSD1 1	AbWS1A	4.00939	0	11.7951	31.4685	15.0787	0	10.7869	17.2285	2.15201	5.32762	1.1818	0.480368	0.491079
B	MaFAR/AbWSD1 1	AbWS1B	4.02559	9.23439	17.2499	25.6953	11.0461	0.499394	11.0902	18.8478	1.0979	0.231568	0.535184	0.206767	0.239955
A	MaFAR/AbWSD1 2	AbWS3A	10.3912	12.0835	8.91068	19.7314	19.3774	0.363275	8.67794	18.8916	0.516712	0.168992	0	0.414183	0.473147
B	MaFAR/AbWSD1 2	AbWS3B	5.88535	6.16479	23.0992	21.7094	19.5797	0	7.60527	13.7786	1.48603	0.185736	0.241935	0	0.263996
A	MaFAR/AbWSD1 3	AbWS6A	12.9846	4.80008	20.1199	22.2524	9.43735	0.332089	9.24123	17.9312	1.5989	0.242535	0.478693	0	0.581045
B	MaFAR/AbWSD1 3	AbWS6B	7.82528	0	17.718	27.994	9.51465	0.873436	10.7009	20.5755	2.15979	1.34647	0	0.625487	0.666503
A	MaFAR/PCOAbWSD1 1	PCO-1A	2.15715	1.30567	43.5896	24.334	13.2027	0	4.62278	9.51539	0	1.27276	0	0	0
B	MaFAR/PCOAbWSD1 1	PCO-1B	3.66918	2.54734	27.089	21.8007	20.2178	1.86304	5.37319	13.9009	0	3.53897	0	0	0
A	MaFAR/PCOAbWSD1 2	PCO-6A	5.64383	0.89673	0	37.2148	18.6559	3.24485	15.4427	15.274	1.64034	1.98685	0	0	0
B	MaFAR/PCOAbWSD1 2	PCO-6B	2.24927	1.43403	30.0461	27.5241	26.5291	0.792053	0.975838	8.46088	0	1.98857	0	0	0
A	MaFAR/PCOAbWSD1 3	PCO-10A	3.14279	1.50548	28.2567	36.7124	13.5806	1.45457	1.42145	11.6598	0.295082	1.97104	0	0	0
B	MaFAR/PCOAbWSD1 3	PCO-10B	4.90317	1.74244	9.39186	33.7742	16.2858	2.70294	14.083	13.6239	0	3.49265	0	0	0
A	MaFAR/TMMmAWAT2-AbWSD1 1	TM-6A	1.97022	0	2.67869	31.4144	47.9488	2.14028	2.31998	6.08356	0	5.44398	0	0	0
B	MaFAR/TMMmAWAT2-AbWSD1 1	TM-6B	1.77136	1.00278	15.7766	53.5478	16.9754	0	4.52319	4.91618	0	1.48663	0	0	0
A	MaFAR/TMMmAWAT2-AbWSD1 2	TM-22A	1.70734	0.966542	17.5289	56.5271	12.739	0	4.35971	4.7385	0	1.4329	0	0	0
B	MaFAR/TMMmAWAT2-AbWSD1 2	TM-22B	1.70474	0.643103	9.55797	56.4411	21.1381	0	4.35307	4.73129	0	1.43072	0	0	0
A	MaFAR/TMMmAWAT2-AbWSD1 3	TM-27A	2.20101	0	0	55.0757	37.072	0	0	5.65135	0	0	0	0	0
B	MaFAR/TMMmAWAT2-AbWSD1 3	TM-27B	4.13385	3.08842	4.45014	46.4636	33.5366	2.39628	0	5.93112	0	0	0	0	0
A	MaFAR/MaWS2 1	3067-8A	2.65673	0	12.5832	41.3891	31.5712	7.0443	1.20369	3.55179	0	0	0	0	0
B	MaFAR/MaWS2 1	3067-8B	3.09668	1.85669	14.4611	39.8305	36.7993	0	1.91289	2.04286	0	0	0	0	0
A	MaFAR/MaWS2 2	3067-23A	2.43568	0.568468	7.69986	70.9867	14.256	0	0.71523	2.53262	0	0.805433	0	0	0
B	MaFAR/MaWS2 2	3067-23B	2.49428	0.582145	15.573	62.4967	11.1478	0	1.38986	2.59356	0	3.09228	0	0	0.630347
A	MaFAR/MaWS2 3	3067-30A	1.43048	1.30951	5.75371	75.0181	12.1363	0	0.438837	3.91306	0	0	0	0	0
B	MaFAR/MaWS2 3	3067-30B	1.47454	1.34984	14.1087	72.3855	8.68365	0	0.452354	1.05004	0	0	0	0	0.495337

## Sheet: OH mean
Mean and standard deviation:relative amounts of fatty alcohols
Mean	mol%	mol%	mol%	mol%	mol%	mol%	mol%	mol%	mol%	mol%	mol%	mol%	mol%
	16:0-OH	16:1-OH	18:0-OH	18:1-OH	18:2-OH	18:3-OH	20:0-OH	20:1-OH	20:2-OH	22:1-OH	22:2-OH	24:0-OH	24:1-OH
MaFAR/ScWS	6.00576	1.35891	10.7834	39.0317	9.72043	3.92315	6.97173	16.4817	1.62458	1.24336	0.570545	0.649617	1.6351
ScWS-MaFAR	2.71084	0.511669	9.73221	20.9768	4.64642	0.36524	8.33838	48.7237	0.953864	1.89187	0.535364	0.448094	0.165561
ScWS-MaFAR/ScWS-MaFAR	1.68096	0.252965	6.29514	19.2035	7.72813	0.786689	4.51994	51.6832	0.73987	6.8881	0.221493	0	0
ScWS-MaFAR/MaFAR	3.11283	0.419255	9.17615	27.7212	6.56294	0.846429	4.50845	44.2661	0.398894	2.87121	0.116578	0	0
MaFAR/AbWSD1	7.52024	5.38046	16.4821	24.8085	14.0057	0.344699	9.68375	17.8755	1.50189	1.25049	0.406269	0.287801	0.452621
MaFAR/PCOAbWSD1	3.62756	1.57195	23.0622	30.2267	18.0787	1.67624	6.9865	12.0725	0.322571	2.37514	0	0	0
MaFAR/TMMmAWAT2-AbWSD1	2.24809	0.950142	8.33205	49.9116	28.235	0.756092	2.59266	5.342	0	1.63237	0	0	0
MaFAR/MaWS2	2.26473	0.944443	11.6966	60.3511	19.0991	1.17405	1.01881	2.61399	0	0.64962	0	0	0.187614
standard deviation
	mol%	mol%	mol%	mol%	mol%	mol%	mol%	mol%	mol%	mol%	mol%	mol%	mol%
	16:0-OH	16:1-OH	18:0-OH	18:1-OH	18:2-OH	18:3-OH	20:0-OH	20:1-OH	20:2-OH	22:1-OH	22:2-OH	24:0-OH	24:1-OH
MaFAR/ScWS	0.514555	1.9513	1.75858	3.8241	4.0792	3.23981	0.598751	9.49176	2.76022	1.55868	0.817869	0.438043	1.81801
ScWS-MaFAR	0.480567	0.649772	5.72255	1.99713	3.8228	0.566622	1.37814	7.94757	1.07454	3.38928	0.267635	0.50007	0.2568
ScWS-MaFAR/ScWS-MaFAR	1.26836	0.392488	3.44365	5.36326	2.14982	0.613847	3.6449	4.943	0.698962	8.91203	0.295262	0	0
ScWS-MaFAR/MaFAR	1.18422	0.503644	0.777465	6.02494	3.10568	0.693025	1.0709	7.80653	0.248114	1.88556	0.285555	0	0
MaFAR/AbWSD1	3.6168	4.87101	5.26177	4.4092	4.70904	0.32913	1.39695	2.30106	0.632286	2.04889	0.442816	0.260504	0.170261
MaFAR/PCOAbWSD1	1.41358	0.553303	15.6977	6.5804	4.97072	1.19919	6.27943	2.67402	0.656275	0.925426	0	0	0
MaFAR/TMMmAWAT2-AbWSD1	0.943445	1.13799	7.18274	9.80125	13.5063	1.17413	2.16641	0.618252	0	1.99797	0	0	0
MaFAR/MaWS2	0.670534	0.677408	4.01409	15.8639	11.9372	2.87582	0.586622	1.03404	0	1.23927	0	0	0.293769

## Sheet: FA mol%
Additional file 2
Relative Fatty Acid Amounts (in wax esters)
		mol%	mol%	mol%	mol%	mol%	mol%	mol%	mol%	mol%	mol%	mol%	mol%	mol%	mol%	mol%
Extraction	Construct	16:0-FA	16:1-FA	18:0-FA	18:1-FA	18:2-FA	18:3-FA	20:0-FA	20:1-FA	20:2-FA	20:3-FA	22:0-FA	22:1-FA	22:2-FA	24:0-FA	24:1-FA
A	MaFAR/ScWS 1	16.8791	0.622032	5.98852	14.5041	7.17423	1.38464	3.79165	37.3588	1.14453	0.532029	1.38155	2.44418	5.29567	0.923591	0.575501
B	MaFAR/ScWS 1	9.8779	0	9.59681	18.3311	5.65152	5.63822	3.00144	35.3047	0.821122	3.00028	1.14771	1.77719	3.01322	1.81081	1.028
A	MaFAR/ScWS 2	8.35884	1.50313	10.648	17.7716	5.60308	5.41791	2.38685	43.2511	0	0	1.36811	2.94743	0	0	0.743983
B	MaFAR/ScWS 2	7.61089	1.47256	10.0997	18.672	6.94474	5.96574	2.63617	39.8252	0.3866	0	1.68327	3.55982	0.475401	0	0.667981
A	ScWS-MaFAR 1	12.6183	0	3.74631	6.86165	10.166	6.01909	3.58716	47.2788	1.79279	0.555196	1.23773	5.13468	0	0.506526	0.495825
B	ScWS-MaFAR 1	19.9492	0	2.58509	4.9985	7.60804	4.56108	2.72278	46.2616	1.26457	3.15111	0	2.78535	2.4094	1.70327	0
A	ScWS-MaFAR 2	10.562	0.892391	4.41117	6.22542	10.438	6.58747	3.53151	48.3502	1.85808	0.613605	0.897051	3.84005	0.380379	0.39474	1.01793
B	ScWS-MaFAR 2	19.6053	1.76497	3.19284	4.70249	7.80619	6.30077	2.74679	41.3485	1.52241	2.94462	0	2.91767	3.12742	2.02003	0
A	ScWS-MaFAR 3	11.8641	0	4.62906	5.88825	11.3854	5.98981	3.58519	46.6145	2.31229	0.664332	0.773337	4.63526	0.603529	0	1.05498
B	ScWS-MaFAR 3	23.799	0	3.28958	4.13303	7.98165	5.63633	2.51248	39.9649	1.6524	3.84578	0.98111	2.91522	1.49405	1.79454	0
A	ScWS-MaFAR/ScWS-MaFAR 1	1.33141	0.425029	2.09571	4.67667	9.77423	13.7974	3.01191	41.096	1.76208	15.7656	1.59811	3.44453	0.450828	0.2633	0.507192
B	ScWS-MaFAR/ScWS-MaFAR 1	6.68876	0	2.33969	4.73255	9.84215	10.5673	2.89565	46.5928	1.55748	8.41839	1.15968	3.11347	0	2.09206	0
A	ScWS-MaFAR/ScWS-MaFAR 2	8.06187	0	3.64402	6.87244	11.2353	7.3825	3.74657	50.5267	2.06874	0.782935	1.01378	4.09442	0	0	0.570663
B	ScWS-MaFAR/ScWS-MaFAR 2	19.1932	1.98091	2.19389	4.07704	12.9681	9.08218	2.36113	32.5202	1.2679	6.607	0.751283	2.63925	0	1.69069	2.66715
A	ScWS-MaFAR/ScWS-MaFAR 3	16.3969	0.997173	4.90087	11.3847	13.7082	9.79442	2.24378	33.9995	2.08671	0.608007	0.583769	2.01171	0	0	1.28417
B	ScWS-MaFAR/ScWS-MaFAR 3	9.36483	0.732434	4.64119	11.3121	9.44986	9.36531	2.76694	35.2537	2.33122	7.68479	2.43203	0.530417	0.558786	2.44475	1.13157
A	ScWS-MaFAR/MaFAR 1	8.50262	1.43841	5.28423	12.6498	14.6386	10.6589	2.63717	39.1639	2.60772	0	0	2.41862	0	0	0
B	ScWS-MaFAR/MaFAR 1	10.2507	1.11861	4.34221	9.72494	11.836	9.77355	2.67654	36.1247	2.36618	6.65084	1.97924	0.37159	0	2.78488	0
A	ScWS-MaFAR/MaFAR 2	14.4662	1.01093	2.93398	15.3428	7.50564	5.45287	1.72587	46.9914	1.45823	0.589	0.447601	2.07547	0	0	0
B	ScWS-MaFAR/MaFAR 2	5.07668	0.356526	2.63923	13.4164	8.19491	9.41042	1.90544	47.8448	1.47353	4.75293	1.35677	0.284833	0.31895	2.348	0.620559
A	ScWS-MaFAR/MaFAR 3	16.1579	0	4.67305	19.5381	16.3106	5.60383	2.09184	30.8935	1.73516	0.625507	0.633502	1.73703	0	0	0
B	ScWS-MaFAR/MaFAR 3	5.6569	0	4.02157	12.5321	13.7319	14.0936	2.23105	36.7335	1.7133	5.27178	0.225165	0.30302	0	2.3295	1.15657
A	MaFAR/AbWSD1 1	8.65168	0	22.7184	20.7597	10.7574	5.01595	5.01917	5.053	7.8877	3.73545	2.42321	0.985025	3.91982	1.64667	1.42689
B	MaFAR/AbWSD1 1	10.5241	0	27.781	16.3303	9.75689	5.4522	6.26236	11.5142	6.09421	3.41242	0.754765	0	1.06979	1.04767	0
A	MaFAR/AbWSD1 2	5.42149	0	23.9818	24.2253	8.13894	4.67192	8.1441	5.71864	9.25033	2.86522	1.32691	1.08484	3.60509	1.06472	0.500631
B	MaFAR/AbWSD1 2	5.69652	0	24.8995	13.7704	8.97961	2.9872	10.7143	15.1794	9.63551	3.16465	0	1.38529	1.40963	0.902683	1.27515
A	MaFAR/AbWSD1 3	7.32211	3.35217	27.7976	11.7651	7.80747	2.42843	6.55534	11.1597	9.9145	5.57971	0.757037	1.35512	2.38045	0.980122	0.84514
B	MaFAR/AbWSD1 3	8.15961	3.12709	11.342	22.5649	9.85433	8.2557	3.28289	16.3594	8.32568	2.33785	0	1.38101	2.48722	1.2643	1.25806
A	MaFAR/PCOAbWSD1 1	13.61	0.252965	48.3684	19.3381	4.0294	2.35684	4.77373	2.67178	3.56483	0.209923	0.575216	0.248766	0	0	0
B	MaFAR/PCOAbWSD1 1	11.0799	9.47667	44.4	19.5708	3.62767	2.1427	1.59784	0	8.10439	0	0	0	0	0	0
A	MaFAR/PCOAbWSD1 2	6.15582	0.754099	36.3163	24.311	7.88735	1.49782	3.69069	19.3869	0	0	0	0	0	0	0
B	MaFAR/PCOAbWSD1 2	13.5497	0.449558	36.9467	18.2299	21.6005	2.13596	0.986694	0.829382	4.57862	0.140715	0.385577	0.166753	0	0	0
A	MaFAR/PCOAbWSD1 3	16.4424	1.74873	50.279	18.9115	7.58818	2.31309	1.06852	0.898158	0	0.152384	0.417551	0.18058	0	0	0
B	MaFAR/PCOAbWSD1 3	4.44939	0.22497	40.317	22.1931	24.6348	0.400093	1.07583	1.10037	4.68499	0.186692	0.51156	0.221237	0	0	0
A	MaFAR/TMMmAWAT2-AbWSD1 1	10.9966	0.246331	30.3774	26.8231	3.2007	2.33315	2.07525	4.44694	1.63877	4.66002	3.56755	5.96404	0.86459	2.31117	0.494441
B	MaFAR/TMMmAWAT2-AbWSD1 1	12.022	0.250123	25.8626	27.236	3.24997	2.0205	3.62533	4.51539	2.43343	4.73175	3.62247	6.05584	0.8779	2.99458	0.502053
A	MaFAR/TMMmAWAT2-AbWSD1 2	6.63472	4.03566	41.0524	28.0418	4.90494	3.63334	1.00297	6.56583	0	0	1.69219	2.43623	0	0	0
B	MaFAR/TMMmAWAT2-AbWSD1 2	6.97291	4.24838	34.4656	29.5199	5.16349	3.5463	1.05584	6.37533	1.87725	0	1.78139	3.3055	0	0.988914	0.699231
A	MaFAR/TMMmAWAT2-AbWSD1 3	4.41971	0.191181	44.9862	28.9344	3.23348	1.75433	3.95545	0	0	1.36624	4.71466	6.44443	0	0	0
B	MaFAR/TMMmAWAT2-AbWSD1 3	4.41486	0.191663	45.0996	26.135	3.24164	1.75876	3.96543	0	2.63611	1.36969	4.72655	6.46068	0	0	0
A	MaFAR/MaWS2 1	5.94056	4.96799	65.9831	21.1368	0	1.97164	0	0	0	0	0	0	0	0	0
B	MaFAR/MaWS2 1	6.87205	0.329028	53.198	25.5021	5.52183	4.02548	1.55437	1.62222	0	0	0.944364	0.430566	0	0	0
A	MaFAR/MaWS2 2	6.86034	0.329069	53.2047	25.5053	5.52252	4.02599	1.55457	1.62242	0	0	0.944482	0.43062	0	0	0
B	MaFAR/MaWS2 2	4.38772	4.9852	66.2116	21.21	1.227	1.97847	0	0	0	0	0	0	0	0	0
A	MaFAR/MaWS2 3	6.92196	0.445682	61.4698	17.2655	5.45316	4.00538	1.3851	1.26363	0	0	0.771363	1.01839	0	0	0
B	MaFAR/MaWS2 3	4.38457	0.454482	62.6835	17.6065	5.56083	4.08447	2.112	1.28858	0	0	0.786594	1.0385	0	0	0
	Wildtype (sterolester background)	17.0764	0	10.9447	9.08308	12.2316	20.1155	10.45	4.72704	1.78376	1.56532	2.38847	1.81975	3.27602	1.66792	2.87051
	Wildtype (sterolester background)	9.26584	0	10.8688	8.7565	13.0142	21.1836	5.3002	4.72923	4.05463	3.26426	0	2.7916	2.46712	0	14.304
							0

## Sheet: FA mean
Mean and standard deviation:relative amounts of fatty acids (in wax esters)
Mean
	mol%	mol%	mol%	mol%	mol%	mol%	mol%	mol%	mol%	mol%	mol%	mol%	mol%	mol%	mol%
	16:0-FA	16:1-FA	18:0-FA	18:1-FA	18:2-FA	18:3-FA	20:0-FA	20:1-FA	20:2-FA	20:3-FA	22:0-FA	22:1-FA	22:2-FA	24:0-FA	24:1-FA
MaFAR/ScWS	8.61588	0.991897	10.1148	18.2582	6.06645	5.67395	2.67482	39.4603	0.402574	1.00009	1.3997	2.76148	1.16287	0.603604	0.813322
ScWS-MaFAR	16.3996	0.442893	3.64234	5.46822	9.23087	5.84909	3.11432	44.9697	1.73376	1.96244	0.648205	3.70471	1.3358	1.06985	0.428122
ScWS-MaFAR/ScWS-MaFAR	10.1728	0.689258	3.30256	7.17592	11.163	9.99819	2.83766	39.9982	1.84569	6.64445	1.25644	2.63897	0.168269	1.0818	1.02679
ScWS-MaFAR/MaFAR	10.0185	0.65408	3.98238	13.8674	12.0363	9.16553	2.21132	39.6253	1.89235	2.98168	0.773713	1.19843	0.0531584	1.24373	0.296189
MaFAR/AbWSD1	7.62925	1.07988	23.0867	18.236	9.21577	4.8019	6.66303	10.8307	8.51799	3.51588	0.876987	1.03188	2.47867	1.15103	0.884311
MaFAR/PCOAbWSD1	10.8812	2.15117	42.7712	20.4257	11.5613	1.80775	2.19888	4.14777	3.4888	0.114952	0.314984	0.136223	0	0	0
MaFAR/TMMmAWAT2-AbWSD1	7.57679	1.52722	36.974	27.7817	3.83237	2.50773	2.61338	3.65058	1.43093	2.02128	3.3508	5.11112	0.290415	1.04911	0.282621
MaFAR/MaWS2	5.89453	1.91857	60.4585	21.371	3.88089	3.34857	1.10101	0.966141	0	0	0.574467	0.486345	0	0	0
Standard deviation
	mol%	mol%	mol%	mol%	mol%	mol%	mol%	mol%	mol%	mol%	mol%	mol%	mol%	mol%	mol%
	16:0-FA	16:1-FA	18:0-FA	18:1-FA	18:2-FA	18:3-FA	20:0-FA	20:1-FA	20:2-FA	20:3-FA	22:0-FA	22:1-FA	22:2-FA	24:0-FA	24:1-FA
MaFAR/ScWS	1.15516	0.859144	0.525734	0.454574	0.761013	0.275656	0.309114	3.98574	0.410794	1.73221	0.269176	0.905746	1.61998	1.04547	0.189762
ScWS-MaFAR	5.41431	0.739534	0.777148	1.02773	1.62464	0.707411	0.503976	3.4437	0.353571	1.51059	0.52465	1.0017	1.23458	0.86567	0.508973
ScWS-MaFAR/ScWS-MaFAR	6.56545	0.746327	1.27089	3.36848	1.80832	2.13921	0.537516	7.34791	0.391786	5.62533	0.674488	1.25155	0.262907	1.11889	0.927397
ScWS-MaFAR/MaFAR	4.54468	0.616844	1.0204	3.31548	3.55641	3.26849	0.38514	6.61656	0.481019	2.89867	0.750839	0.986736	0.130211	1.37215	0.48916
MaFAR/AbWSD11	1.9189	1.67445	6.10559	5.02844	1.12034	2.06595	2.5654	4.6812	1.41735	1.11828	0.912225	0.533112	1.1387	0.271111	0.550923
MaFAR/PCOAbWSD1 1	4.67399	3.63279	5.86453	2.33443	9.17233	0.755558	1.62634	7.51628	3.10714	0.0923676	0.253099	0.109459	0	0	0
MaFAR/TMMmAWAT2-AbWSD1	3.24567	2.02669	8.00155	1.29196	0.934677	0.865108	1.41153	2.96508	1.16576	2.1603	1.34815	1.76829	0.449929	1.31782	0.318184
MaFAR/MaWS2	1.22446	2.36936	5.9148	3.6129	2.56071	1.06425	0.887525	0.764259	0	0	0.451115	0.462001	0	0	0

## Sheet: Acyl and alcohol moiety
Mean
	mol%	mol%	mol%	mol%	mol%	mol%	mol%	mol%	mol%	mol%	mol%	mol%	mol%
	16:0-OH	16:1-OH	18:0-OH	18:1-OH	18:2-OH	18:3-OH	20:0-OH	20:1-OH	20:2-OH	22:1-OH	22:2-OH	24:0-OH	24:1-OH
MaFAR/ScWS	6.00576	1.35891	10.7834	39.0317	9.72043	3.92315	6.97173	16.4817	1.62458	1.24336	0.570545	0.649617	1.6351
ScWS-MaFAR	2.71084	0.511669	9.73221	20.9768	4.64642	0.36524	8.33838	48.7237	0.953864	1.89187	0.535364	0.448094	0.165561
ScWS-MaFAR/ScWS-MaFAR	1.68096	0.252965	6.29514	19.2035	7.72813	0.786689	4.51994	51.6832	0.73987	6.8881	0.221493	0	0
ScWS-MaFAR/MaFAR	3.11283	0.419255	9.17615	27.7212	6.56294	0.846429	4.50845	44.2661	0.398894	2.87121	0.116578	0	0
MaFAR/AbWSD1	7.52024	5.38046	16.4821	24.8085	14.0057	0.344699	9.68375	17.8755	1.50189	1.25049	0.406269	0.287801	0.452621
MaFAR/PCOAbWSD1	3.62756	1.57195	23.0622	30.2267	18.0787	1.67624	6.9865	12.0725	0.322571	2.37514	0	0	0
MaFAR/TMMmAWAT2-AbWSD1	2.24809	0.950142	8.33205	49.9116	28.235	0.756092	2.59266	5.342	0	1.63237	0	0	0
MaFAR/MaWS2	2.26473	0.944443	11.6966	60.3511	19.0991	1.17405	1.01881	2.61399	0	0.64962	0	0	0.187614
standard deviation
	mol%	mol%	mol%	mol%	mol%	mol%	mol%	mol%	mol%	mol%	mol%	mol%	mol%
	16:0-OH	16:1-OH	18:0-OH	18:1-OH	18:2-OH	18:3-OH	20:0-OH	20:1-OH	20:2-OH	22:1-OH	22:2-OH	24:0-OH	24:1-OH
MaFAR/ScWS	0.514555	1.9513	1.75858	3.8241	4.0792	3.23981	0.598751	9.49176	2.76022	1.55868	0.817869	0.438043	1.81801
ScWS-MaFAR	0.480567	0.649772	5.72255	1.99713	3.8228	0.566622	1.37814	7.94757	1.07454	3.38928	0.267635	0.50007	0.2568
ScWS-MaFAR/ScWS-MaFAR	1.26836	0.392488	3.44365	5.36326	2.14982	0.613847	3.6449	4.943	0.698962	8.91203	0.295262	0	0
ScWS-MaFAR/MaFAR	1.18422	0.503644	0.777465	6.02494	3.10568	0.693025	1.0709	7.80653	0.248114	1.88556	0.285555	0	0
MaFAR/AbWSD1	3.6168	4.87101	5.26177	4.4092	4.70904	0.32913	1.39695	2.30106	0.632286	2.04889	0.442816	0.260504	0.170261
MaFAR/PCOAbWSD1	1.41358	0.553303	15.6977	6.5804	4.97072	1.19919	6.27943	2.67402	0.656275	0.925426	0	0	0
MaFAR/TMMmAWAT2-AbWSD1	0.943445	1.13799	7.18274	9.80125	13.5063	1.17413	2.16641	0.618252	0	1.99797	0	0	0
MaFAR/MaWS2	0.670534	0.677408	4.01409	15.8639	11.9372	2.87582	0.586622	1.03404	0	1.23927	0	0	0.293769
Mean
	mol%	mol%	mol%	mol%	mol%	mol%	mol%	mol%	mol%	mol%	mol%	mol%	mol%	mol%	mol%
	16:0-FA	16:1-FA	18:0-FA	18:1-FA	18:2-FA	18:3-FA	20:0-FA	20:1-FA	20:2-FA	20:3-FA	22:0-FA	22:1-FA	22:2-FA	24:0-FA	24:1-FA
MaFAR/ScWS	8.61588	0.991897	10.1148	18.2582	6.06645	5.67395	2.67482	39.4603	0.402574	1.00009	1.3997	2.76148	1.16287	0.603604	0.813322
ScWS-MaFAR	16.3996	0.442893	3.64234	5.46822	9.23087	5.84909	3.11432	44.9697	1.73376	1.96244	0.648205	3.70471	1.3358	1.06985	0.428122
ScWS-MaFAR/ScWS-MaFAR	10.1728	0.689258	3.30256	7.17592	11.163	9.99819	2.83766	39.9982	1.84569	6.64445	1.25644	2.63897	0.168269	1.0818	1.02679
ScWS-MaFAR/MaFAR	10.0185	0.65408	3.98238	13.8674	12.0363	9.16553	2.21132	39.6253	1.89235	2.98168	0.773713	1.19843	0.0531584	1.24373	0.296189
MaFAR/AbWSD1	7.62925	1.07988	23.0867	18.236	9.21577	4.8019	6.66303	10.8307	8.51799	3.51588	0.876987	1.03188	2.47867	1.15103	0.884311
MaFAR/PCOAbWSD1	10.8812	2.15117	42.7712	20.4257	11.5613	1.80775	2.19888	4.14777	3.4888	0.114952	0.314984	0.136223	0	0	0
MaFAR/TMMmAWAT2-AbWSD1	7.57679	1.52722	36.974	27.7817	3.83237	2.50773	2.61338	3.65058	1.43093	2.02128	3.3508	5.11112	0.290415	1.04911	0.282621
MaFAR/MaWS2	5.89453	1.91857	60.4585	21.371	3.88089	3.34857	1.10101	0.966141	0	0	0.574467	0.486345	0	0	0
Standard deviation
	mol%	mol%	mol%	mol%	mol%	mol%	mol%	mol%	mol%	mol%	mol%	mol%	mol%	mol%	mol%
	16:0-FA	16:1-FA	18:0-FA	18:1-FA	18:2-FA	18:3-FA	20:0-FA	20:1-FA	20:2-FA	20:3-FA	22:0-FA	22:1-FA	22:2-FA	24:0-FA	24:1-FA
MaFAR/ScWS	1.15516	0.859144	0.525734	0.454574	0.761013	0.275656	0.309114	3.98574	0.410794	1.73221	0.269176	0.905746	1.61998	1.04547	0.189762
ScWS-MaFAR	5.41431	0.739534	0.777148	1.02773	1.62464	0.707411	0.503976	3.4437	0.353571	1.51059	0.52465	1.0017	1.23458	0.86567	0.508973
ScWS-MaFAR/ScWS-MaFAR	6.56545	0.746327	1.27089	3.36848	1.80832	2.13921	0.537516	7.34791	0.391786	5.62533	0.674488	1.25155	0.262907	1.11889	0.927397
ScWS-MaFAR/MaFAR	4.54468	0.616844	1.0204	3.31548	3.55641	3.26849	0.38514	6.61656	0.481019	2.89867	0.750839	0.986736	0.130211	1.37215	0.48916
MaFAR/AbWSD11	1.9189	1.67445	6.10559	5.02844	1.12034	2.06595	2.5654	4.6812	1.41735	1.11828	0.912225	0.533112	1.1387	0.271111	0.550923
MaFAR/PCOAbWSD1 1	4.67399	3.63279	5.86453	2.33443	9.17233	0.755558	1.62634	7.51628	3.10714	0.0923676	0.253099	0.109459	0	0	0
MaFAR/TMMmAWAT2-AbWSD1	3.24567	2.02669	8.00155	1.29196	0.934677	0.865108	1.41153	2.96508	1.16576	2.1603	1.34815	1.76829	0.449929	1.31782	0.318184
MaFAR/MaWS2	1.22446	2.36936	5.9148	3.6129	2.56071	1.06425	0.887525	0.764259	0	0	0.451115	0.462001	0	0	0

## Sheet: chain length_saturation degree
Chain length of fatty alcohols								Chain length of fatty acids
	OH	OH	OH	OH	OH				FA	FA	FA	FA	FA
Mean	C16	C18	C20	C22	C24			Mean	C16	C18	C20	C22	C24
MaFAR/ScWS	6.40317	59.1635	30.1426	1.24451	3.04629			MaFAR/ScWS	13.6895	34.1345	42.4773	7.52976	2.16895
ScWS-MaFAR	3.22251	35.7207	58.0159	2.42723	0.613654			ScWS-MaFAR	16.8425	24.1905	51.7803	5.68871	1.49797
ScWS-MaFAR/ScWS-MaFAR	1.93393	34.0135	57.043	7.10959	0			ScWS-MaFAR/ScWS-MaFAR	10.8621	31.6397	51.326	4.06368	2.10859
ScWS-MaFAR/MaFAR	3.53209	44.3067	49.1734	2.98778	0			ScWS-MaFAR/MaFAR	10.6726	39.0516	46.7107	2.0253	1.53992
MaFAR/AbWSD1	12.9007	55.641	29.0612	1.90724	0.740422			MaFAR/AbWSD1	8.72625	55.3346	29.5117	4.39192	2.03589
MaFAR/PCOAbWSD1	5.19951	73.0438	19.3815	2.37514	0			MaFAR/PCOAbWSD1	13.0324	76.566	9.95041	0.451207	0
MaFAR/TMMmAWAT2-AbWSD1	3.19823	87.2347	7.93466	1.63237	0			MaFAR/TMMmAWAT2-AbWSD1	9.10401	71.0957	9.71617	8.75234	1.33173
MaFAR/MaWS2	3.20917	92.3208	3.6328	0.84962	0.187614			MaFAR/MaWS2	8.48853	88.5146	1.94191	1.05495	0
Standard deviation	C16	C18	C20	C22	C24			Standard deviation	C16	C18	C20	C22	C24
MaFAR/ScWS	1.94863	4.4653	5.18083	1.2256	2.06283			MaFAR/ScWS	3.96405	5.64186	1.55503	2.03016	1.00674
ScWS-MaFAR	0.758401	3.95327	6.6207	3.39051	0.528881			ScWS-MaFAR	4.79934	3.65879	2.75972	0.521223	0.412747
ScWS-MaFAR/ScWS-MaFAR	1.35185	8.18826	3.86876	8.74672	0			ScWS-MaFAR/ScWS-MaFAR	7.18	4.74226	9.42199	1.10292	1.55235
ScWS-MaFAR/MaFAR	1.40298	6.63301	8.56605	2.01034	0			ScWS-MaFAR/MaFAR	4.6217	6.28396	6.9073	0.758047	1.7025
MaFAR/AbWSD1	4.74693	5.48223	3.56738	2.40982	0.378899			MaFAR/AbWSD1	2.59567	5.04486	5.9525	2.03408	0.71776
MaFAR/PCOAbWSD1	1.45209	10.6865	6.59752	0.925426	0			MaFAR/PCOAbWSD1	3.28788	6.75379	7.14723	0.362558	0
MaFAR/TMMmAWAT2-AbWSD1	1.99366	2.6337	1.69631	1.99797	0			MaFAR/TMMmAWAT2-AbWSD1	3.52033	8.53949	3.68832	3.24016	1.56887
MaFAR/MaWS2	0.868937	2.00543	1.15685	1.23927	0.293769			MaFAR/MaWS2	2.0891	1.0272	1.62019	0.844224	0
Saturation degree of fatty alcohols								Saturation degree of fatty acids
	OH	OH	OH	OH
Mean	Saturated	Monoenoic	Dienoic	Trienoic					FA	FA	FA	FA
MaFAR/ScWS	23.9048	61.2984	12.4163	2.38042				Mean	Saturated	Monoenoic	Dienoic	Trienoic
ScWS-MaFAR	21.2295	72.2696	6.13565	0.36524				MaFAR/ScWS	27.1995	55.9727	11.5501	5.27758
ScWS-MaFAR/ScWS-MaFAR	12.496	78.0278	8.6895	0.886689				ScWS-MaFAR	24.8744	55.0137	12.3004	7.81153
ScWS-MaFAR/MaFAR	16.7974	75.2777	7.07841	0.846429				ScWS-MaFAR/ScWS-MaFAR	18.6513	51.5291	13.1769	16.6426
MaFAR/AbWSD1	34.2244	49.7676	15.9138	0.344699				ScWS-MaFAR/MaFAR	18.2296	55.6414	13.9818	12.1472
MaFAR/PCOAbWSD1	33.6763	46.2462	18.4012	1.67624				MaFAR/AbWSD1	39.4135	32.0571	20.2125	8.31713
MaFAR/TMMmAWAT2-AbWSD1	13.1728	57.8361	28.235	0.756092				MaFAR/PCOAbWSD1	56.1663	26.8609	15.0501	1.9227
MaFAR/MaWS2	15.1801	64.7468	19.0991	1.17405				MaFAR/TMMmAWAT2-AbWSD1	51.564	38.3532	5.55371	4.52901
								MaFAR/MaWS2	68.3453	24.6618	3.65856	3.33434
Standard deviation	Saturated	Monoenoic	Dienoic	Trienoic
MaFAR/ScWS	1.6157	3.41593	1.85815	3.23981				Standard deviation	Saturated	Monoenoic	Dienoic	Trienoic
ScWS-MaFAR	3.99853	6.0068	2.66199	0.566622				MaFAR/ScWS	3.13964	5.40853	3.38757	2.76364
ScWS-MaFAR/ScWS-MaFAR	4.59761	4.88769	2.14428	0.534178				ScWS-MaFAR	4.89784	5.37076	1.15732	1.27276
ScWS-MaFAR/MaFAR	2.40155	3.79825	3.03864	0.693025				ScWS-MaFAR/ScWS-MaFAR	6.63001	6.1616	1.62892	7.54061
MaFAR/AbWSD1	4.52629	4.90367	4.44895	0.32913				ScWS-MaFAR/MaFAR	4.15049	7.04468	3.75494	5.45843
MaFAR/PCOAbWSD1	5.86862	7.98139	4.99866	1.19919				MaFAR/AbWSD1	2.57934	1.86938	1.85655	1.48746
MaFAR/TMMmAWAT2-AbWSD1	4.59752	7.85738	8.36772	1.17413				MaFAR/PCOAbWSD1	5.19843	3.51472	2.02589	0.939375
MaFAR/MaWS2	3.52456	13.9599	2.31257	2.87582				MaFAR/TMMmAWAT2-AbWSD1	5.37438	3.99817	1.3534	1.82911
								MaFAR/MaWS2	4.27912	3.61224	2.56071	1.06425

## Sheet: FA amount in WE
Absolute amounts of fatty acid moieties waxesters in mg/g seed
		µg/g seed	µg/g seed	µg/g seed	µg/g seed	µg/g seed	µg/g seed	µg/g seed	µg/g seed	µg/g seed	µg/g seed	µg/g seed	µg/g seed	µg/g seed	µg/g seed	µg/g seed	µg/g seed
Extraction	Construct	16:0-FA	16:1-FA	18:0-FA	18:1-FA	18:2-FA	18:3-FA	20:0-FA	20:1-FA	20:2-FA	20:3-FA	22:0-FA	22:1-FA	22:2-FA	24:0-FA	24:1-FA	sum	FA mg/g
A	MaFAR/ScWS 1	6593.06	241.172	2581.84	6210.85	3051.28	584.864	1788.31	17511	532.536	246.28	706.351	1244.67	2650.18	510.399	316.39	44769.2	44.7692
B	MaFAR/ScWS 1	4750.02	0	5093.65	9663.66	2959.13	2931.92	1742.76	20372.5	470.352	1709.8	722.4	1114.16	1856.43	1231.96	695.766	55314.5	55.3145
A	MaFAR/ScWS 1	2348.11	419.127	3301.49	5472.96	1713.83	1645.82	809.605	14579.8	0	0	503.048	1079.44	0	0	294.154	32167.3	32.1673
B	MaFAR/ScWS 1	2509.22	481.895	3675.22	6748.64	2493.04	2126.9	1049.43	15755.9	151.827	0	726.397	1530.08	200.807	0	309.961	37759.3	37.7593
A	ScWS-MaFAR 1	1623.7	0	532.086	967.959	1424.37	837.56	557.356	7300.51	274.802	84.6655	208.472	861.395	0	92.2146	89.7993	14854.9	14.8549
B	ScWS-MaFAR 1	3343.98	0	478.282	918.543	1388.6	826.769	551.093	9305.47	252.502	625.973	0	608.694	517.442	403.937	0	19221.3	19.2213
A	ScWS-MaFAR 2	1241.25	104.098	572.185	802.052	1335.66	837.162	501.127	6818.53	260.112	85.4584	137.989	588.343	57.2722	65.6319	168.37	13575.2	13.5752
B	ScWS-MaFAR 2	3525.54	315.04	633.725	927.051	1528.48	1225.25	596.421	8922.65	326.113	627.532	0	684.024	720.535	513.927	0	20546.3	20.5463
A	ScWS-MaFAR 3	1360.99	0	586.117	740.507	1422.12	743.04	496.602	6416.84	315.97	90.3149	116.119	693.23	88.7021	0	170.335	13240.9	13.2409
B	ScWS-MaFAR 3	5329.28	0	813.061	1014.62	1946.13	1364.85	679.342	10739.1	440.767	1020.59	287.57	851.069	428.639	568.534	0	25483.6	25.4836
A	ScWS-MaFAR/ScWS-MaFAR 1	240.762	76.2908	418.292	927.121	1924.55	2698.08	657.65	8917.8	379.565	3378.63	378.269	812.064	104.449	67.3627	129.089	21110	21.11
B	ScWS-MaFAR/ScWS-MaFAR 1	1591.18	0	614.334	1234.22	2549.37	2718.42	831.754	13300.7	441.347	2373.32	361.1	965.608	0	704.108	0	27685.4	27.6854
A	ScWS-MaFAR/ScWS-MaFAR 2	1115.22	0	556.388	1042.22	1692.31	1104.35	625.799	8387.4	340.891	128.353	183.564	738.414	0	0	111.108	16026	16.026
B	ScWS-MaFAR/ScWS-MaFAR 2	5095.39	522.001	642.86	1186.58	3748.65	2607.35	756.877	10360.1	400.959	2078.68	261.065	913.468	0	635.017	996.588	30205.6	30.2056
A	ScWS-MaFAR/ScWS-MaFAR 3	2513.76	151.743	829.289	1913.4	2288.29	1623.75	415.353	6254.83	381.073	110.465	117.144	402.078	0	0	277.091	17278.3	17.2783
B	ScWS-MaFAR/ScWS-MaFAR 3	1549.98	120.329	847.864	2052.55	1703.02	1676.2	552.97	7001.83	459.615	1507.34	526.879	114.453	118.491	572.469	263.601	19067.6	19.0676
A	ScWS-MaFAR/MaFAR 1	2865.54	481.185	1965.65	4673.7	5371.82	3884.59	1073.16	15838.7	1046.88	0	0	1062.68	0	0	0	38263.9	38.2639
B	ScWS-MaFAR/MaFAR 1	2674.49	289.696	1250.46	2781.61	3362.48	2757.52	843.212	11310.3	735.391	2056.45	675.929	126.396	0	1027.98	0	29891.9	29.8919
A	ScWS-MaFAR/MaFAR 2	4550.43	315.644	1018.66	5290.87	2570.73	1854.83	655.517	17737.8	546.399	219.568	184.292	851.137	0	0	0	35795.8	35.7958
B	ScWS-MaFAR/MaFAR 2	1633.81	113.891	937.496	4733.47	2871.67	3274.99	740.443	18477.3	564.889	1812.75	571.538	119.507	131.51	1069.08	281.089	37333.4	37.3334
A	ScWS-MaFAR/MaFAR 3	4793.92	0	1530.31	6354.93	5269.2	1797.92	749.393	10999	613.239	219.934	246.02	671.888	0	0	0	33245.8	33.2458
B	ScWS-MaFAR/MaFAR 3	1579.21	0	1239.16	3835.39	4174.09	4254.64	752.047	12305.6	569.744	1744.1	82.2768	110.285	0	920.058	454.435	32021.1	32.0211
A	MaFAR/AbWSD1 1	328.729	0	952.767	864.73	445.054	206.096	230.274	230.392	357.003	168.204	120.516	48.7941	190.818	88.5187	76.3074	4308.2	4.3082
B	MaFAR/AbWSD1 1	462.674	0	1348.06	787.06	467.057	259.204	332.433	607.444	319.148	177.79	43.4328	0	60.2564	65.1639	0	4929.72	4.92972
A	MaFAR/AbWSD1 2	224.742	0	1097.29	1100.93	367.37	209.431	407.648	284.473	456.782	140.76	71.9986	58.6295	191.469	62.4446	29.2094	4703.17	4.70317
B	MaFAR/AbWSD1 2	242.781	0	1171.3	643.391	416.706	137.673	551.373	776.32	489.174	159.839	0	76.9709	76.9709	54.4291	76.4898	4873.41	4.87341
A	MaFAR/AbWSD1 3	284.366	129.224	1191.57	500.911	330.157	101.987	307.406	520.087	458.667	256.807	38.4835	68.6122	118.445	53.8535	46.1965	4406.78	4.40678
B	MaFAR/AbWSD1 3	303.073	115.291	464.983	918.829	398.541	331.597	147.234	729.165	368.368	102.908	0	66.8738	118.361	66.4387	65.7683	4197.43	4.19743
A	MaFAR/PCOAbWSD1 1	1218.96	22.489	4781.54	1898.77	392.956	228.268	516.26	287.155	380.327	22.2817	67.4343	29.0475	0	0	0	9845.49	9.84549
B	MaFAR/PCOAbWSD1 1	941.874	799.629	4165.93	1823.85	335.778	196.969	164.008	0	820.657	0	0	0	0	0	0	9248.69	9.24869
A	MaFAR/PCOAbWSD1 2	484.173	58.8735	3152.74	2096.24	675.483	127.395	350.509	1829.81	0	0	0	0	0	0	0	8775.22	8.77522
B	MaFAR/PCOAbWSD1 2	1115.28	36.7294	3356.59	1644.97	1935.9	190.119	98.0641	81.9195	448.922	13.7261	41.5412	17.894	0	0	0	8981.66	8.98166
A	MaFAR/PCOAbWSD1 3	1147.41	121.13	3872.67	1446.77	576.579	174.551	90.0345	75.2118	0	12.6022	38.1398	16.4288	0	0	0	7571.52	7.57152
B	MaFAR/PCOAbWSD1 3	384.301	19.2873	3843.53	2101.41	2316.8	37.369	112.2	114.049	482.019	19.1096	57.834	24.9121	0	0	0	9512.83	9.51283
A	MaFAR/TMMmAWAT2-AbWSD1 1	993.275	22.0855	3028.55	2656.1	314.794	227.895	226.339	482.009	176.325	498.833	421.793	702.321	100.055	295.35	62.8589	10208.6	10.2086
B	MaFAR/TMMmAWAT2-AbWSD1 1	1048.48	21.6529	2489.61	2604.07	308.627	190.557	381.776	472.566	252.807	489.06	413.53	688.562	98.095	369.5	61.6274	9890.52	9.89052
A	MaFAR/TMMmAWAT2-AbWSD1 2	806.093	486.691	5505.19	3735	648.881	477.362	147.139	957.268	0	0	269.109	385.891	0	0	0	13418.6	13.4186
B	MaFAR/TMMmAWAT2-AbWSD1 2	900.147	544.376	4910.85	4177.7	725.79	495.056	164.578	987.605	288.673	0	301.006	556.314	0	180.613	127.045	14359.8	14.3598
A	MaFAR/TMMmAWAT2-AbWSD1 3	370.59	15.9119	4163.43	2659.73	295.216	159.071	400.472	0	0	135.763	517.448	704.478	0	0	0	9422.11	9.42211
B	MaFAR/TMMmAWAT2-AbWSD1 3	422.543	18.2083	4764.3	2742.2	337.822	182.029	458.269	0	300.54	155.357	592.127	806.15	0	0	0	10779.6	10.7796
A	MaFAR/MaWS2 1	459.938	381.794	5638.66	1794.04	0	165.074	0	0	0	0	0	0	0	0	0	8439.52	8.43952
B	MaFAR/MaWS2 1	701.651	33.346	5995.18	2854.52	613.884	444.459	191.631	198.758	0	0	126.209	57.3135	0	0	0	11216.9	11.2169
A	MaFAR/MaWS2 2	596.349	28.3935	5104.78	2430.57	522.71	378.449	163.17	169.239	0	0	107.465	48.8014	0	0	0	9549.93	9.54993
B	MaFAR/MaWS2 2	407.2	459.228	6782.28	2157.91	123.989	198.554	0	0	0	0	0	0	0	0	0	10129.2	10.1292
A	MaFAR/MaWS2 3	530.719	33.9185	5201.99	1451.24	455.253	332.093	128.231	116.262	0	0	77.4125	101.796	0	0	0	8428.91	8.42891
B	MaFAR/MaWS2 3	411.032	42.2904	6485.95	1809.44	567.619	414.06	239.066	144.958	0	0	96.5196	126.922	0	0	0	10337.9	10.3379
A	Wildtype (sterolester background)	437.424	0	309.444	255.073	341.16	557.209	323.222	145.304	54.4287	47.5188	80.0835	60.7718	107.515	60.4472	103.492	2883.09	2.88309
B	Wildtype (sterolester background)	295.215	0	382.215	305.849	451.48	729.849	203.902	180.811	153.883	123.252	0	115.955	100.707	0	641.434	3684.55	3.68455

## Sheet: OH amount in WE
Absolute amounts of fatty alcohol moieties in mg/g seed
		µg/g seed	µg/g seed	µg/g seed	µg/g seed	µg/g seed	µg/g seed	µg/g seed	µg/g seed	µg/g seed	µg/g seed	µg/g seed	µg/g seed	µg/g seed	µg/g seed
Extraction	construct	16:0-OH	16:1-OH	18:0-OH	18:1-OH	18:2-OH	18:3-OH	20:0-OH	20:1-OH	20:2-OH	22:1-OH	22:2-OH	24:0-OH	24:1-OH	sum	OH mg/g
A	MaFAR/ScWS 1	2377.52	168.712	5519.88	17478	5241.74	549.443	3965.78	10393.8	0	366.355	0	483.765	2478.54	49023.6	49.0236
B	MaFAR/ScWS 1	3022.21	0	4321.74	18866.6	1900.24	1755.16	3405.78	13305.8	3125.59	0	1036.5	611.577	285.276	51636.5	51.6365
A	MaFAR/ScWS 1	3585.92	2515.26	8452.89	29562.5	6784.03	5529.73	5324.05	1932.98	0	2816.56	0	0	0	66503.9	66.5039
B	MaFAR/ScWS 1	2909.53	399.794	5805.15	20571.5	7398.37	1290.97	4349.76	11914.9	476.213	552.071	371.201	664.416	1560.32	58264.2	58.2642
A	ScWS-MaFAR 1	317.21	164.744	1179.79	2571.25	1090.67	0	990.88	6014.04	0	198.159	0	0	81.0914	12607.8	12.6078
B	ScWS-MaFAR 1	378.026	0	1285.39	2820.62	222.228	0	948.664	6368.16	217.43	0	87.9099	115.648	73.7048	12517.8	12.5178
A	ScWS-MaFAR 2	219.7	92.3178	966.328	2063.5	736.268	102.534	863.561	5321.9	0	157.168	70.2669	0	0	10593.5	10.5935
B	ScWS-MaFAR 2	177.982	40.3447	926.732	1904.66	10.0056	100.629	771.118	5340.54	165.433	0	76.8224	106.973	0	9621.24	9.62124
A	ScWS-MaFAR 3	266.908	0	2095.88	2053.66	839.628	0	1160.34	4627.04	0	1216.22	82.7738	0	0	12342.5	12.3425
B	ScWS-MaFAR 3	223.233	0	0	1987.16	164.318	0	1148.94	6284.78	246.923	0	80.2436	131.427	0	10267	10.267
A	ScWS-MaFAR/MaFAR 1	837.909	0	3331.73	6688.73	688.945	0	2406.76	20794.1	256.104	374.329	0	0	0	35378.6	35.3786
B	ScWS-MaFAR/MaFAR 1	671.301	346.129	3108.06	6767.11	3537.9	0	1479.83	18118.2	0	795.945	0	0	0	34824.5	34.8245
A	ScWS-MaFAR/MaFAR 2	986.416	0	2676.19	10777.9	1670.28	357.401	1546.73	15165.4	93.4425	266.504	0	0	0	33540.3	33.5403
B	ScWS-MaFAR/MaFAR 2	479.891	0	2972.95	11714.8	1993.96	418.659	1346.33	17132.6	221.089	2143.78	0	0	0	38424.1	38.4241
A	ScWS-MaFAR/MaFAR 3	1212.45	212.131	2810.13	8008.52	2603.81	476.952	1407.99	11497.5	113.334	1499.54	241.453	0	0	30083.8	30.0838
B	ScWS-MaFAR/MaFAR 3	1304.64	164.789	3427.97	11291.8	2200.93	367.487	1735.62	14591.2	198.048	1890.98	0	0	0	37173.4	37.1734
A	ScWS-MaFAR/ScWS-MaFAR 1	0	0	0	2384.86	1582.44	0	0	10152.5	0	4515.14	0	0	0	18634.9	18.6349
B	ScWS-MaFAR/ScWS-MaFAR 1	646.696	0	1434.92	3424.12	2115.03	0	0	16097.5	0	4246.11	0	0	0	27964.4	27.9644
A	ScWS-MaFAR/ScWS-MaFAR 2	105.861	0	1635.27	3969.68	1595.28	216.936	1535.46	9211.32	127.696	266.96	0	0	0	18664.4	18.6644
B	ScWS-MaFAR/ScWS-MaFAR 2	374.285	0	1315.58	2745.12	574.629	170.922	1226.49	7635.75	245.523	382.737	49.9207	0	0	14721	14.721
A	ScWS-MaFAR/ScWS-MaFAR 3	144.068	108.52	1012.74	4205.69	1378.83	162.501	972.902	7602.78	249.811	143.418	137.653	0	0	16118.9	16.1189
B	ScWS-MaFAR/ScWS-MaFAR 3	329.031	90.9431	988.516	2510.07	823.228	151.633	867.894	8796.21	102.757	223.438	46.8754	0	0	14930.6	14.9306
A	MaFAR/AbWSD1 1	152.354	0	500.042	1324.21	624.97	0	504.757	800.777	99.3504	271.049	59.755	26.7017	27.1431	4391.11	4.39111
B	MaFAR/AbWSD1 1	191.163	434.968	913.883	1351.24	572.142	25.6749	648.519	1094.78	63.3414	14.7229	33.8169	14.363	16.5744	5375.19	5.37519
A	MaFAR/AbWSD1 2	507.086	584.901	485.127	1066.3	1031.41	19.1929	521.485	1127.65	30.6349	11.0414	0	29.5664	33.585	5447.99	5.44799
B	MaFAR/AbWSD1 2	307.229	319.215	1345.29	1255	1114.86	0	488.894	879.802	94.2475	12.9816	16.8053	0	20.0458	5854.37	5.85437
A	MaFAR/AbWSD1 3	673.877	247.101	1164.95	1278.89	534.223	18.6593	590.596	1138.28	100.815	16.8525	33.0571	0	43.8627	5841.17	5.84117
B	MaFAR/AbWSD1 3	245.918	0	621.203	974.231	326.141	29.7175	414.115	790.917	82.462	56.6536	0	28.7541	30.4668	3600.58	3.60058
A	MaFAR/PCOAbWSD1 1	186.22	111.803	4198.16	2326.3	1243.17	0	491.428	1004.76	0	147.106	0	0	0	9708.95	9.70895
B	MaFAR/PCOAbWSD1 1	252.417	173.824	2079.08	1660.83	1517.06	138.759	455.188	1169.72	0	325.961	0	0	0	7772.84	7.77284
A	MaFAR/PCOAbWSD1 2	443.521	69.9001	0	3238.64	1599.11	276.074	1494.43	1468.19	156.613	209.048	0	0	0	8955.53	8.95553
B	MaFAR/PCOAbWSD1 2	149.886	94.7873	2233.76	2031.13	1928.25	57.143	80.0766	689.644	0	177.419	0	0	0	7442.09	7.44209
A	MaFAR/PCOAbWSD1 3	233.729	111.057	2344.49	3023.54	1101.64	117.118	130.178	1060.67	26.6619	196.26	0	0	0	8345.34	8.34534
B	MaFAR/PCOAbWSD1 3	422.233	148.837	902.312	3220.82	1529.7	252.001	1493.42	1435.05	0	402.689	0	0	0	9807.07	9.80707
A	MaFAR/TMMmAWAT2-AbWSD1 1	169.688	0	257.387	2996.2	4504.39	199.571	246.054	640.892	0	627.758	0	0	0	9641.94	9.64194
B	MaFAR/TMMmAWAT2-AbWSD1 1	180.715	101.478	1795.69	6049.74	1889	0	568.255	613.49	0	203.063	0	0	0	11401.4	11.4014
A	MaFAR/TMMmAWAT2-AbWSD1 2	197.889	111.121	2266.66	7255.47	1610.49	0	622.257	671.791	0	222.361	0	0	0	12958	12.958
B	MaFAR/TMMmAWAT2-AbWSD1 2	211.83	79.2656	1325.03	7766.59	2864.94	0	666.093	719.117	0	238.025	0	0	0	13870.9	13.8709
A	MaFAR/TMMmAWAT2-AbWSD1 3	207.655	0	0	5754.2	3814.93	0	0	652.171	0	0	0	0	0	10429	10.429
B	MaFAR/TMMmAWAT2-AbWSD1 3	397.369	294.477	477.245	4946.04	3516.25	249.383	0	697.375	0	0	0	0	0	10578.1	10.5781
A	MaFAR/MaWS2 1	235.675	0	1245.33	4065.91	3054.76	676.541	131.489	385.392	0	0	0	0	0	9795.1	9.7951
B	MaFAR/MaWS2 1	314.515	187.051	1638.61	4479.89	4076.68	0	239.246	253.79	0	0	0	0	0	11189.8	11.1898
A	MaFAR/MaWS2 2	208.165	48.1912	734.174	6718.46	1328.95	0	75.2735	264.757	0	92.1629	0	0	0	9470.13	9.47013
B	MaFAR/MaWS2 2	213.353	49.3924	1486.12	5919.94	1040.08	0	146.397	271.357	0	354.139	0	0	78.4274	9559.21	9.55921
A	MaFAR/MaWS2 3	129.609	117.689	581.606	7527.04	1199.39	0	48.9626	433.67	0	0	0	0	0	10038	10.038
B	MaFAR/MaWS2 3	143.083	129.924	1527.38	7778.37	919.083	0	54.0528	124.632	0	0	0	0	69.9142	10746.4	10.7464
A	Wildtype (sterolester background)	0	119.129	0	46.3111	233.913	0	84.7174	80.4016	1421.99	135.165	0	96.2134	48.0813	2265.92	2.26592
B	Wildtype (sterolester background)	0	335.365	0	1164.91	155.583	0	726.569	139.831	0	0	0	0	264.952	2787.21	2.78721

## Sheet: WE_TAG content
Wax ester and TAG content
	mg/g seeds			mg/g seeds	mg/g seeds
	Mean	Standard dev.		Mean	WE + TAG	%	%
	WE	WE		TAG	sum	WE	TAG
MaFAR/ScWS	94.5615	3.4		135.374	229.936	41.1251	58.8749
ScWS-MaFAR	22.9	1.9		155.2	178.1	12.858	87.142
ScWS-MaFAR/ScWS-MaFAR	34.7	5.3		174.39	209.09	16.5958	83.4042
ScWS-MaFAR/MaFAR	64.1	12.8		141.466	205.566	31.1822	68.8178
MaFAR/AbWSD1	4.1	1.5		155.745	159.845	2.56498	97.435
MaFAR/PCOAbWSD1	11.8	8.48528		269.982	281.782	4.18764	95.8124
MaFAR/TMMmAWAT2-AbWSD1	17.1345	2.63014		214.843	231.977	7.38628	92.6137
MaFAR/MaWS2	14	5.2		206.792	220.792	6.3408	93.6592

## Sheet: FA amount in TAG
TAG content in seeds mg/g
		µg/g seed	µg/g seed	µg/g seed	µg/g seed	µg/g seed	µg/g seed	µg/g seed	µg/g seed	µg/g seed	µg/g seed	µg/g seed	µg/g seed	µg/g seed	µg/g seed				TAG
Extraction	construct	16:0-FA	16:1-FA	18:0-FA	18:1-FA	18:2-FA	18:3-FA	20:0-FA	20:1-FA	20:2-FA	20:3-FA	22:0-FA	22:1-FA	24:1-FA	sum	mg/g			mg/g seeds
A	MaFAR/ScWS 1	14524.4	758.806	3408.1	15318.6	28195.5	46057.4	1873.58	13776.9	2194.94	1642.03	416.848	3106.29	954.845	132228	132.228			Mean
B	MaFAR/ScWS 1	14619.1	406.441	3804.87	18988.2	30621.4	51555.9	2126.41	16423.4	2288.25	1770.29	482.748	3618.06	1040.55	147746	147.746		MaFAR/ScWS	135.374
A	MaFAR/ScWS 1	12669.9	524.05	2877.49	15272.6	23862.9	46549.9	1782.65	14801.9	2000.11	1521.73	400.818	2995.84	889.728	126150	126.15		ScWS-MaFAR	155.2
B	ScWS-MaFAR 1	14881.2	1310.62	4280.31	18416.4	54097.1	22135	3203.34	18941.9	1777.07	1633.64	0	5412.59	1256.83	147346	147.346		ScWS-MaFAR/ScWS-MaFAR	174.39
A	ScWS-MaFAR 1	18698.7	2073.21	4387.59	19721.1	51582.9	36298.9	2412.05	17736.3	2825.76	2113.95	536.65	3999.04	1229.27	163615	163.615		ScWS-MaFAR/MaFAR	141.466
B	ScWS-MaFAR 2	14000.8	2630.5	3267.22	15675.8	42367.4	20418.9	2139.64	14529.7	1632.09	1428.11	0	3592.58	970.836	122654	122.654		MaFAR/AbWSD1	155.745
A	ScWS-MaFAR 2	19376.5	2538.48	5043.05	25167.3	64166.9	40586.2	2818.38	21767.8	3032.88	2346.38	639.843	4795.45	1379.17	193658	193.658		MaFAR/PCOAbWSD1	269.982
B	ScWS-MaFAR 3	16270.2	3701.34	4412.99	16824	45891.1	24522	3317.79	14501.2	1887.71	2080.76	0	5406.21	0	138815	138.815		MaFAR/TMMmAWAT2-AbWSD1	214.843
A	ScWS-MaFAR 3	17877.1	3596.8	5888.17	22581.3	48112.1	26758.7	4245.54	22525.3	2268.32	2121.79	814.699	6642.36	1678.8	165111	165.111		MaFAR/MaWS2	206.792
B	ScWS-MaFAR/ScWS-MaFAR 1	19927.6	1783.81	5754.22	20130.7	60106.7	27927.8	4278.35	20860.6	2290.83	2311.85	812.987	6691.76	1449.5	174327	174.327
A	ScWS-MaFAR/ScWS-MaFAR 1	19429	1495.85	6655.92	26746.2	50458.9	35120.9	4425.43	26100.4	2855.25	2489.54	880.074	6997.2	1869.02	185524	185.524
B	ScWS-MaFAR/ScWS-MaFAR 2	21940.5	4840.41	5783.02	10125.9	57348.8	14641.9	5323.28	10978	4723.72	6985.53	3401.43	6266.23	1929.83	154288	154.288
A	ScWS-MaFAR/ScWS-MaFAR 2	17729	1706.63	6678.17	24945.6	58486.6	35020.7	4483.4	25264.3	2856.83	2756.54	820.539	7757.41	1681.05	190187	190.187
B	ScWS-MaFAR/ScWS-MaFAR 3	27478.3	5384.71	7882.43	27111.7	38414.1	41681.6	6846.77	23759.2	3669.94	3933.82	1367.64	12151.2	1659.28	201341	201.341
A	ScWS-MaFAR/ScWS-MaFAR 3	17841.9	3659.1	4509.9	15307.7	46966.2	26634.5	3619.56	11098.5	2221.29	3474.14	0	5338.02	0	140671	140.671
B	ScWS-MaFAR/MaFAR 1	11595.2	2326.66	3400.29	14829.9	68890.1	23845.5	2795.64	10285.8	2101.3	3492.68	0	5636.5	0	149200	149.2
A	ScWS-MaFAR/MaFAR 1	20011.8	2574.51	5049.9	19004.1	45465.2	30881.9	4445.84	18067.5	3015.54	3902.85	867.444	9252.77	1032.66	163572	163.572
B	ScWS-MaFAR/MaFAR 2	3589.41	1294.03	1519.46	6138.26	83928.7	25143.6	1297.38	4297.49	0	1035.35	0	1978.06	0	130222	130.222
A	ScWS-MaFAR/MaFAR 2	14585.7	1972.87	3725.39	13828.7	81599.2	22937.3	2982.19	11170.4	1992.38	2868.73	596.067	5594.69	750.853	164604	164.604
B	ScWS-MaFAR/MaFAR 3	9916.74	2552.17	3317.52	14562.1	43223.9	22440.3	2526.83	14003.8	2211.69	3010.2	0	6700.29	0	124466	124.466
A	ScWS-MaFAR/MaFAR 3	8460.81	1002.01	2714.03	13646.5	64507.6	14881.4	1469.1	5037.28	1085.14	1611.38	0	2317.09	0	116732	116.732
B	MaFAR/AbWSD1 1	12565.8	560.825	5051.97	26586.3	805.646	22551.8	2815.69	24662	4713.74	983.585	423.234	2518.25	16063.3	120302	120.302
A	MaFAR/AbWSD1 1	11450	4491.8	24364	2647.38	37496.6	19664.8	4678.88	23369.4	5880.02	2802.71	5568.85	4245.19	2484.19	149144	149.144
B	MaFAR/AbWSD1 2	11310.2	463.73	5026.81	19894.6	39197.9	26125.2	3213.94	26818.8	5911.07	1142.89	424.787	2756.87	5253.93	147541	147.541
A	MaFAR/AbWSD1 2	10875.7	4633.98	19202.4	2202.16	39358	23737.5	5542.13	25845.1	9152.84	10573.5	9816.25	4979.86	1475.21	167395	167.395
B	MaFAR/AbWSD1 3	13617.6	633.746	6143.81	26752.7	314.334	31169.3	3884.52	34668.5	6277.39	1112.32	565.689	4321.47	39580.1	169042	169.042
A	MaFAR/AbWSD1 3	11892.1	5374.57	23584.3	3214.91	44284.1	26107.9	5905.45	30869.9	8899.73	6266.76	8150.44	5400.89	1099.08	181050	181.05
B	MaFAR/PCOAbWSD1 1	18695.8	1309.8	13089	52425.8	83065.3	48998.7	11649.2	53785	4161.22	1025.74	2275.78	5055.43	0	295537	295.537
A	MaFAR/PCOAbWSD1 1	19712	1694.19	9484.18	39233.9	79727.5	54652.5	5579.67	47029.4	4468	1367.11	1298.29	2674.22	1375.42	268296	268.296
B	MaFAR/PCOAbWSD1 2	20091	1726.78	9666.57	39988.4	81260.7	55703.5	5686.97	47933.8	4553.93	1393.4	0	4168.22	0	272173	272.173
A	MaFAR/PCOAbWSD1 2	19055.3	1334.98	13340.7	53434	84662.8	49941	11873.2	54819.3	4241.24	1045.47	2319.55	5152.65	0	301220	301.22
B	MaFAR/PCOAbWSD1 3	16396.6	972.315	9802.74	39747.4	69799.7	44134.5	7613	43410.9	3680.78	1010.54	1063.87	3951.81	0	241584	241.584
A	MaFAR/PCOAbWSD1 3	14882	1982.07	9802.74	39747.4	65760.7	48173.5	7613	43410.9	3680.78	1010.54	1063.87	3951.81	0	241079	241.079
B	MaFAR/TMMmAWAT2-AbWSD1 1	22219.5	1160.54	6914.64	29834.5	59995.7	45311.7	4189.17	33348.5	3490.79	1024.62	0	3252.95	0	210743	210.743
A	MaFAR/TMMmAWAT2-AbWSD1 1	22107.2	1326.03	6631.87	23478.8	61230.1	49263	4467.15	36987	4300.26	1305.45	493.398	3817.53	0	215408	215.408
B	MaFAR/TMMmAWAT2-AbWSD1 2	25499.1	1529.49	7649.41	27081.1	70624.7	56821.5	5152.55	42661.9	4960.05	1505.74	569.1	4403.26	0	248458	248.458
A	MaFAR/TMMmAWAT2-AbWSD1 2	21054.7	1099.7	6552.14	28270.5	56850.4	42936.2	3969.55	31600.2	3307.79	970.905	0	3082.41	0	199694	199.694
B	MaFAR/TMMmAWAT2-AbWSD1 3	18268.2	2030.28	7968.32	26451.8	64757.7	52079.7	4957.39	41828.2	4725.36	1386.45	0	4371.96	0	228825	228.825
A	MaFAR/TMMmAWAT2-AbWSD1 3	19603.1	1023.88	6100.43	26321.5	52931.1	39976.1	3695.89	29421.6	3079.74	903.97	0	2869.91	0	185927	185.927
B	MaFAR/MaWS2 1	9864.21	1866.42	4258.51	20027.8	42969.7	29464.7	2300.26	23300.1	2584.73	0	0	1968.06	0	138604	138.604
A	MaFAR/MaWS2 1	11900.7	2251.75	5137.69	24162.6	51841	35547.8	2775.15	28110.4	3118.36	0	0	2374.37	0	167220	167.22
B	MaFAR/MaWS2 2	20751	1477.9	10057.8	40183.2	80617.7	50563	5785.88	47741.6	5119.5	1158.55	905.759	4297.11	0	268659	268.659
A	MaFAR/MaWS2 2	16758.4	845.993	8310.58	30758.5	62395	40879.6	4581.15	39578.8	3891.48	976.419	854.809	3529.21	0	213360	213.36
B	MaFAR/MaWS2 3	19891.2	1004.14	9864.16	36508.5	73537	48521.6	5437.55	46977.7	4618.95	1158.95	0	4188.96	0	251709	251.709
A	MaFAR/MaWS2 3	15974.7	1137.73	7742.76	30934.2	56442.3	38924.9	4454.14	36752.8	3941.14	891.882	697.279	3308.04	0	201202	201.202
